# Supplementary material
Source: publisher figshare collection journal article supplement (https://geolsoc.figshare.com/articles/dataset/_/3453563)
Supplement: Supplementary file 1 [file 1]

**Supplementary data Table A: Detrital apatite fission-track data for Coastal Range sections.**

| Sample                  | Long.<br>(°) | Lat.<br>(°) | No.<br>grains | Grain age<br>distribution<br>(Ma) |       | Age<br>dispersion |       | Pooled<br>Age<br>(Ma)* | Depositional<br>Age (Ma) | Age components    |                   |                 |
|-------------------------|--------------|-------------|---------------|-----------------------------------|-------|-------------------|-------|------------------------|--------------------------|-------------------|-------------------|-----------------|
|                         |              |             |               | Min                               | Max   | $\chi^2$          | RE%   |                        |                          | <u>1st</u>        | <u>2nd</u>        | <u>3rd</u>      |
| <i>SH1</i>              | 23.779       | 121.536     | 61            | 5.2                               | 68.9  | 92.2              | 0.2   | 13.2±1.8               | >3.79                    |                   |                   |                 |
| <i>SH2</i>              | 23.777       | 121.539     | 53            | 4.8                               | 86.2  | 25.8              | 30.1  | 11.9±1.7               | >3.79                    |                   |                   |                 |
| <i>SM1</i> <sup>+</sup> | 23.411       | 121.441     | 20            | 3.1                               | 231.4 | 0.0               | 125.4 | 16.3±1.2               | 3.22-2.58                | 11.4±2.2<br>(90%) | 204±70<br>(10%)   |                 |
| <i>SM4</i> <sup>+</sup> | 23.410       | 121.444     | 28            | 1.0                               | 123.5 | 0.0               | 79.8  | 19.0±1.5               | 3.22-2.58                | 14.4±3.1<br>(80%) | 72±35<br>(20%)    |                 |
| <i>HK1</i> <sup>+</sup> | 23.498       | 121.410     | 26            | 1.0                               | 168.7 | 0.0               | 143.0 | 23.0±1.8               | 2.58-2.06                | 4.1±2.5<br>(65%)  | 33±11<br>(19%)    | 110±29<br>(16%) |
| <i>SC1</i>              | 23.139       | 121.366     | 12            | 1.8                               | 22.2  | 0.0               | 72.2  | 5.6±1.0                | 1.95-1.75                | 3.1±1.6<br>(73%)  | 15.9±6.8<br>(27%) |                 |
| <i>MW3</i>              | 22.985       | 121.301     | 41            | 3.4                               | 206.8 | 0.0               | 103.9 | 36.2±2.2               | 1.75-1.66                | 14.8±3.3<br>(28)  | 112±18<br>(13)    |                 |
| <i>MW6</i>              | 22.999       | 121.281     | 45            | 0.6                               | 25.5  | 0.0               | 77.8  | 4.5±0.4                | 1.3-1.4                  | 2.9±0.5<br>(36)   | 12.7±5<br>(9)     |                 |

<sup>+</sup>data from Kirstein et al., 2010.
