# Supplementary material
Source: publisher figshare collection journal article supplement (https://geolsoc.figshare.com/articles/dataset/_/3453563)
Supplement: Supplementary file 2 [file 1]

Supplementary data Table C: U-Pb grain age data. Discordant grains removed.

| Grain No.         | U (ppm) | Th/U | Uncorrected ratios |        | 207Pb/235U ± s.e. | 207Pb/206Pb |         |
|-------------------|---------|------|--------------------|--------|-------------------|-------------|---------|
|                   |         |      | 206Pb/238U         | ± s.e. |                   |             |         |
| <b>SAMPLE MW1</b> |         |      |                    |        |                   |             |         |
| G13               | 180.3   | 0.73 | 0.5978             | 0.0054 | 15.8100           | 0.2231      |         |
| G8                | 134.9   | 0.48 | 0.4069             | 0.0039 | 6.4835            | 0.1378      |         |
| G5                | 1278.4  | 0.30 | 0.0726             | 0.0007 | 0.5803            | 0.0579      |         |
| G1                | 532.6   | 0.11 | 0.4489             | 0.0039 | 9.3146            | 0.1508      |         |
| G6                | 488.5   | 0.50 | 0.3507             | 0.0031 | 5.5267            | 0.1228      |         |
| G10               | 783.6   | 0.24 | 0.3459             | 0.0030 | 5.6139            | 0.1192      |         |
| G39               | 331.2   | 0.97 | 0.0256             | 0.0003 | 0.1781            | 0.0563      |         |
| G50               | 905.6   | 0.00 | 0.0335             | 0.0003 | 0.2400            | 0.0545      |         |
| G47               | 300.5   | 0.39 | 0.0422             | 0.0005 | 0.2910            | 0.0548      |         |
| G42               | 792.8   | 0.19 | 0.3289             | 0.0029 | 5.8508            | 0.1279      |         |
| G60               | 899.0   | 0.41 | 0.3413             | 0.0030 | 5.2744            | 0.1148      |         |
| G61               | 523.2   | 0.43 | 0.3380             | 0.0030 | 5.0858            | 0.1151      |         |
| G53D              | 538.8   | 0.09 | 0.3007             | 0.0027 | 4.6213            | 0.1147      |         |
| G59               | 1124.7  | 0.06 | 0.2962             | 0.0026 | 4.6391            | 0.1139      |         |
| G56               | 195.0   | 0.36 | 0.0494             | 0.0006 | 0.3319            | 0.0542      |         |
| G73               | 88.1    | 0.63 | 0.2039             | 0.0024 | 1.6679            | 0.0821      |         |
| G72               | 684.9   | 0.29 | 0.3204             | 0.0028 | 4.8054            | 0.1136      |         |
| <b>SAMPLE MW4</b> |         |      |                    |        |                   |             |         |
| G1                | 835.7   | 0.43 | 0.0403             | 0.0004 | 0.2828            | 0.0515      |         |
| G6                | 536.0   | 0.64 | 0.0316             | 0.0003 | 0.2066            | 0.0503      |         |
| G12               | 312.0   | 0.96 | 0.3818             | 0.0036 | 5.1942            | 0.1169      |         |
| G11               | 475.3   | 0.19 | 0.3137             | 0.0028 | 4.7814            | 0.1159      |         |
| G15               | 236.7   | 0.60 | 0.1548             | 0.0015 | 1.2615            | 0.0708      |         |
| <b>SAMPLE SC3</b> |         |      |                    |        |                   |             |         |
| SC40              | 514     | 0.45 | 0.03572            | 0.9    | 0.26088           | 1.3         | 0.05301 |
| SC41              | 295     | 0.66 | 0.34237            | 0.8    | 5.28021           | 1.1         | 0.11276 |
| SC42              | 600     | 0.26 | 0.42603            | 0.8    | 8.96403           | 1           | 0.15298 |
| SC39              | 166     | 0.49 | 0.33422            | 0.9    | 5.03417           | 1.9         | 0.11301 |
| SC33              | 258     | 0.41 | 0.04273            | 1      | 0.31309           | 2.1         | 0.05473 |
| SC37              | 172     | 0.23 | 0.46128            | 0.8    | 8.78281           | 1.5         | 0.14576 |
| SC28              | 95      | 1.24 | 0.13129            | 0.9    | 1.15213           | 2.2         | 0.06742 |
| SC24              | 116     | 0.19 | 0.33305            | 0.9    | 4.63345           | 1.7         | 0.10703 |
| SC25              | 438     | 0.31 | 0.03563            | 0.9    | 0.23957           | 1.5         | 0.05083 |
| SC30              | 391     | 0.06 | 0.32479            | 0.8    | 5.18953           | 1.1         | 0.11758 |
| SC29              | 182     | 0.41 | 0.04234            | 1      | 0.29417           | 2.2         | 0.05212 |
| SC32              | 134     | 0.52 | 0.26819            | 0.9    | 3.30689           | 1.5         | 0.09421 |
| SC15              | 294     | 0.46 | 0.01747            | 1      | 0.1279            | 2.2         | 0.05402 |
| SC16              | 556     | 0.1  | 0.32247            | 0.8    | 5.00027           | 1.2         | 0.11276 |
| SC23              | 304     | 0.21 | 0.32315            | 0.8    | 4.80341           | 1.2         | 0.11317 |
| SC33              | 106     | 0.75 | 0.13365            | 0.9    | 1.12965           | 2.1         | 0.06483 |
| SC22              | 53      | 0.77 | 0.14906            | 1      | 1.47936           | 2.9         | 0.08246 |
| SC14              | 159     | 0.3  | 0.34825            | 0.9    | 5.21898           | 1.5         | 0.11297 |
| SC13              | 145     | 0.27 | 0.03052            | 1.1    | 0.20794           | 3           | 0.05074 |
| SC21              | 223     | 0.74 | 0.01441            | 1.2    | 0.09238           | 3.6         | 0.04814 |
| SC20              | 68      | 1.38 | 0.29693            | 0.9    | 3.61545           | 2.3         | 0.09694 |
| SC18              | 166     | 0.25 | 0.04445            | 1.1    | 0.31854           | 3           | 0.05308 |
| SC19              | 796     | 0.42 | 0.02977            | 0.9    | 0.21082           | 1.3         | 0.05153 |
| SC34              | 1429    | 0.34 | 0.00573            | 1      | 0.03855           | 2.2         | 0.05044 |
| SC35              | 89      | 0.34 | 0.38087            | 0.9    | 5.56057           | 2.2         | 0.11997 |
| SC38              | 167     | 1.09 | 0.34688            | 0.9    | 5.29302           | 1.6         | 0.11505 |
| SC2               | 471     | 0.33 | 0.30541            | 0.9    | 4.73434           | 1.9         | 0.11235 |
| SC1               | 337     | 0.3  | 0.48363            | 0.9    | 11.64258          | 1.4         | 0.17509 |
| SC3               | 166     | 1.17 | 0.17281            | 0.9    | 1.65209           | 2           | 0.0727  |

|      |     |      |         |     |          |     |         |
|------|-----|------|---------|-----|----------|-----|---------|
| SC7  | 869 | 0.34 | 0.02623 | 0.9 | 0.18501  | 1.3 | 0.05219 |
| SC6  | 122 | 0.75 | 0.13914 | 0.9 | 1.24433  | 1.9 | 0.06848 |
| SC12 | 138 | 0.37 | 0.50803 | 0.9 | 10.82098 | 1.8 | 0.16716 |
| SC10 | 333 | 0.5  | 0.03167 | 1   | 0.22329  | 2   | 0.05238 |

**SAMPLE SC4**

|       |     |      |         |     |          |     |         |
|-------|-----|------|---------|-----|----------|-----|---------|
| 4SC8  | 113 | 0.63 | 0.13794 | 0.9 | 1.37243  | 2.2 | 0.07691 |
| 4SC9  | 301 | 0.37 | 0.29998 | 0.9 | 4.54857  | 1.3 | 0.11228 |
| 4SC10 | 375 | 0.58 | 0.02074 | 1   | 0.14131  | 1.9 | 0.05052 |
| 4SC11 | 93  | 0.44 | 0.13741 | 0.9 | 1.29675  | 2   | 0.07413 |
| 4SC13 | 114 | 1.22 | 0.16638 | 0.9 | 1.57951  | 2.2 | 0.07245 |
| 4SC23 | 277 | 1.44 | 0.02022 | 1   | 0.14858  | 2.2 | 0.0553  |
| 4SC25 | 71  | 0.65 | 0.13778 | 0.9 | 1.19051  | 2.1 | 0.06757 |
| 4SC26 | 398 | 0.45 | 0.45834 | 0.8 | 10.37962 | 1   | 0.16314 |
| 4SC28 | 130 | 0.01 | 0.03831 | 1   | 0.26182  | 2.5 | 0.05291 |
| 4SC29 | 161 | 0.47 | 0.07654 | 1   | 0.59309  | 2.4 | 0.05998 |
| 4SC30 | 106 | 0.46 | 0.04428 | 1.1 | 0.30698  | 3.1 | 0.05246 |
| 4SC31 | 209 | 0.41 | 0.01645 | 1.2 | 0.10731  | 3.3 | 0.0493  |
| 4SC32 | 71  | 0.84 | 0.35759 | 0.9 | 5.27449  | 2.2 | 0.11764 |
| 4SC35 | 219 | 0.57 | 0.03584 | 0.9 | 0.24918  | 1.8 | 0.05119 |

| $\pm$ s.e. | Uncorrected ages (Ma) |               |            |               |             |               |
|------------|-----------------------|---------------|------------|---------------|-------------|---------------|
|            | 206Pb/238U            | $\pm 2\sigma$ | 207Pb/235U | $\pm 2\sigma$ | 207Pb/206Pb | $\pm 2\sigma$ |
| 0.0016     | 3020.8                | 48.8          | 2865.4     | 27.3          | 3003.1      | 18.7          |
| 0.0012     | 2200.5                | 40.5          | 2043.7     | 28.7          | 2199.7      | 21.4          |
| 0.0006     | 451.9                 | 13.1          | 464.6      | 15.0          | 524.1       | 13.0          |
| 0.0010     | 2390.4                | 40.1          | 2369.5     | 25.2          | 2355.2      | 17.0          |
| 0.0009     | 1937.7                | 34.8          | 1904.8     | 24.9          | 1997.3      | 17.6          |
| 0.0008     | 1915.0                | 34.3          | 1918.2     | 24.3          | 1943.5      | 16.9          |
| 0.0015     | 162.6                 | 9.0           | 166.4      | 15.0          | 462.2       | 24.9          |
| 0.0009     | 212.1                 | 9.4           | 218.4      | 13.0          | 393.4       | 15.8          |
| 0.0016     | 266.4                 | 11.7          | 259.4      | 20.6          | 405.7       | 24.5          |
| 0.0009     | 1833.1                | 33.4          | 1954.0     | 24.7          | 2069.7      | 17.5          |
| 0.0007     | 1893.0                | 33.7          | 1864.7     | 23.8          | 1876.9      | 16.3          |
| 0.0008     | 1876.8                | 34.0          | 1833.7     | 24.7          | 1881.0      | 17.5          |
| 0.0008     | 1694.6                | 31.5          | 1753.1     | 24.2          | 1875.2      | 17.3          |
| 0.0008     | 1672.4                | 31.0          | 1756.3     | 23.7          | 1862.1      | 16.8          |
| 0.0015     | 310.7                 | 12.5          | 291.0      | 22.0          | 381.0       | 23.2          |
| 0.0016     | 1196.1                | 31.0          | 996.4      | 37.5          | 1248.9      | 33.3          |
| 0.0008     | 1791.7                | 32.7          | 1785.8     | 24.1          | 1858.1      | 17.0          |
| 0.0009     | 254.6                 | 6.9           | 252.9      | 10.9          | 264.2       | 10.0          |
| 0.0011     | 200.2                 | 6.1           | 190.7      | 10.9          | 209.8       | 10.4          |
| 0.0012     | 2084.9                | 35.1          | 1851.7     | 25.7          | 1908.7      | 19.0          |
| 0.0010     | 1759.0                | 29.5          | 1781.6     | 23.4          | 1894.1      | 17.4          |
| 0.0010     | 927.5                 | 19.0          | 828.6      | 23.5          | 951.9       | 20.0          |
| 1.1        | 226.2                 | 1.2           | 235.4      | 7             | 329.2       | 24.9          |
| 0.6        | 1898.1                | 2.1           | 1865.7     | 112.3         | 1844.4      | 11.5          |
| 0.6        | 2287.8                | 0.9           | 2334.3     | 169.4         | 2379.5      | 10.4          |
| 0.8        | 1858.8                | 0.8           | 1825.1     | 179.5         | 1848.4      | 13.9          |
| 1.6        | 269.7                 | 2.8           | 276.6      | 13.1          | 401.2       | 36.1          |
| 0.7        | 2445.2                | 1.5           | 2315.7     | 243.6         | 2296.8      | 11.4          |
| 1.2        | 795.2                 | 0.7           | 778.2      | 50.2          | 850.8       | 25.3          |
| 0.7        | 1853.1                | 2.8           | 1755.3     | 152           | 1749.4      | 13.8          |
| 1.2        | 225.7                 | 0.7           | 218.1      | 7.2           | 233.1       | 28.2          |
| 0.6        | 1813.1                | 0.7           | 1850.9     | 106.2         | 1919.8      | 11.5          |
| 1.7        | 267.3                 | 2.2           | 261.8      | 13.1          | 290.7       | 39.5          |
| 0.8        | 1531.6                | 3             | 1482.7     | 97.6          | 1512.3      | 14.3          |
| 1.9        | 111.6                 | 1.7           | 122.2      | 5.8           | 371.9       | 43.8          |
| 0.7        | 1801.8                | 0.7           | 1819.4     | 111.2         | 1844.4      | 12.1          |
| 0.7        | 1805.1                | 1.8           | 1785.5     | 107.7         | 1850.9      | 12.2          |
| 1.2        | 808.7                 | 3.8           | 767.6      | 46.9          | 768.8       | 25.1          |
| 1.4        | 895.7                 | 0.9           | 922        | 82.9          | 1256.5      | 28.3          |
| 0.7        | 1926.2                | 3.4           | 1855.7     | 147.9         | 1847.7      | 13.2          |
| 2.5        | 193.8                 | 1.3           | 191.8      | 12.8          | 229         | 58.8          |
| 3.3        | 92.2                  | 1.6           | 89.7       | 6.9           | 106.2       | 78.5          |
| 1          | 1676.1                | 1.1           | 1552.9     | 156.9         | 1566.1      | 18.1          |
| 2.3        | 280.4                 | 1.5           | 280.8      | 19            | 332.2       | 51.3          |
| 1.1        | 189.1                 | 1.1           | 194.2      | 5.9           | 264.6       | 26.3          |
| 2.2        | 36.8                  | 2.7           | 38.4       | 2.4           | 215.3       | 51            |
| 0.9        | 2080.3                | 1.5           | 1910       | 223.7         | 1955.8      | 15.6          |
| 0.8        | 1919.7                | 4.3           | 1867.7     | 155.4         | 1880.7      | 14            |
| 0.8        | 1718.1                | 0.8           | 1773.3     | 167.1         | 1837.8      | 15.4          |
| 0.7        | 2543.1                | 0.7           | 2576.1     | 293.8         | 2606.9      | 12.4          |
| 1.1        | 1027.6                | 3             | 990.4      | 66.2          | 1005.6      | 22.1          |

|     |        |     |        |       |        |      |
|-----|--------|-----|--------|-------|--------|------|
| 1.1 | 166.9  | 0.7 | 172.4  | 5     | 293.7  | 25   |
| 1.1 | 839.8  | 1.5 | 820.8  | 47    | 883.1  | 23   |
| 0.8 | 2648.2 | 0.8 | 2507.9 | 333.7 | 2529.4 | 13.4 |
| 1.7 | 201    | 6.5 | 204.6  | 9.2   | 302    | 37.9 |

|     |        |     |        |       |        |      |
|-----|--------|-----|--------|-------|--------|------|
| 1.2 | 833    | 1.5 | 877.2  | 59.8  | 1118.9 | 24.5 |
| 0.8 | 1691.2 | 1.1 | 1739.9 | 117.2 | 1836.6 | 15.1 |
| 1.7 | 132.3  | 3.8 | 134.2  | 6     | 219    | 39   |
| 1.1 | 830    | 0.9 | 844.3  | 52.4  | 1045   | 23.3 |
| 1.2 | 992.1  | 2.7 | 962.2  | 67.8  | 998.6  | 23.7 |
| 1.9 | 129    | 1.1 | 140.7  | 7.1   | 424.4  | 42.9 |
| 1.2 | 832.1  | 2.2 | 796.2  | 50.5  | 855.4  | 25   |
| 0.6 | 2432.2 | 1.5 | 2469.2 | 196.4 | 2488.5 | 10.8 |
| 2   | 242.3  | 0.7 | 236.1  | 13.2  | 324.9  | 45.1 |
| 1.6 | 475.4  | 0.7 | 472.8  | 28.2  | 602.9  | 34.4 |
| 2.4 | 279.3  | 1   | 271.8  | 19.2  | 305.5  | 54.8 |
| 3   | 105.2  | 2.8 | 103.5  | 7.6   | 162.1  | 70.3 |
| 0.8 | 1970.7 | 0.8 | 1864.7 | 209   | 1920.7 | 14.9 |
| 1.5 | 227    | 2.1 | 225.9  | 9.3   | 249.4  | 33.8 |
