# Supplementary material
Source: publisher figshare collection journal article supplement (https://geolsoc.figshare.com/articles/dataset/_/3453563)
Supplement: Supplementary file 3 [file 1]

**Supplementary data Table B. Detrital zircon fission track data for sections from the southern Coastal Range. Age components in Ma with 1 sigma error. Proportion of grains for each component provided as a percentage of the total number of grains measured. Age components resolved using mixture modelling algorithms of Radialplotter (Vermeesch, 2009).**

| Sample | Long.<br>(°) | Lat.<br>(°) | No.<br>grains | Grain age<br>distribution<br>(Ma) |       | Age<br>dispersion<br>$P\chi^2$<br>RE% |     | Depositional<br>Age (Ma) | Age components (Ma) $\pm 1\sigma$ |                       |                       |                       |
|--------|--------------|-------------|---------------|-----------------------------------|-------|---------------------------------------|-----|--------------------------|-----------------------------------|-----------------------|-----------------------|-----------------------|
|        |              |             |               | Min                               | Max   |                                       |     |                          | <u>1st</u>                        | <u>2nd</u>            | <u>3rd</u>            | <u>4th</u>            |
| SC3    | 23.137       | 121.388     | 42            | 1.7                               | 310.1 | 0.0                                   | 106 | 1.47-1.3                 | 4.0 $\pm$ 0.5<br>(14%)            | 68 $\pm$ 5<br>(30%)   | 156 $\pm$ 10<br>(56%) |                       |
| SC4    | 23.136       | 121.378     | 36            | 1.3                               | 291.6 | 0.0                                   | 113 | 1.9-1.6                  | 6.3 $\pm$ 0.6<br>(33%)            | 82 $\pm$ 7<br>(46%)   | 188 $\pm$ 32<br>(21%) |                       |
| MW1    | 22.975       | 121.307     | 74            | 2.4                               | 459.1 | 0.0                                   | 89  | 1.3-1.1                  | 6.5 $\pm$ 0.6<br>(9%)             | 70 $\pm$ 4<br>(39%)   | 151 $\pm$ 10<br>(42%) | 309 $\pm$ 38<br>(10%) |
| MW4    | 22.996       | 121.290     | 65            | 53.2                              | 376.5 | 0.00                                  | 38  | 1.9-1.6                  | 81 $\pm$ 7<br>(18%)               | 161 $\pm$ 11<br>(68%) | 295 $\pm$ 49<br>(14%) |                       |
| MW5    | 22.999       | 121.282     | 77            | 73.0                              | 607.4 | 0.00                                  | 40  | 1.7-1.2                  | 92 $\pm$ 8<br>(17%)               | 171 $\pm$ 9<br>(70%)  | 441 $\pm$ 47<br>(13%) |                       |
